# Supplementary material for: The Role of Taxes in the Disconnect Between Corporate Performance and Economic Growth
Source: Atypon-hosted journal article supplement (doi:10.1287/mnsc.2019.3350), 2019-08-05
Supplement: mnsc.2019.3350.sm1.pdf [file mnsc.2019.3350.sm1.pdf]

## **Internet Appendix**

# **The Role of Taxes in the Disconnect between Corporate Performance and Economic Growth**

March 2019

Urooj Khan  
Columbia University  
uk2117@gsb.columbia.edu

Suresh Nallareddy  
Duke University  
suresh.nallareddy@duke.edu

Ethan Rouen  
Harvard University  
erouen@hbs.edu

## **Table of Contents**

1. Table A1: Aggregate Stock Returns, Dividends, and Subsequent Economic Growth .....2
2. Table A2: Corporate Profits and Economic Growth: Alternative Tax Difference Cutoff .....3

**Table A1: Aggregate Stock Returns, Dividends, and Subsequent Economic Growth**

Table A1 presents evidence of the relation between the aggregate wealth effect (measured using aggregate quarterly stock returns and aggregate dividends) and one quarter-ahead GDP and personal consumption expenditures. *Agg\_ret* is the aggregate quarterly stock returns. *Agg\_Div* is the aggregate quarterly dividends measured using the definitions in Boudoukh et al. (2007). All other variable definitions are in the Variable Appendix. t-statistics with Newey-West correction for autocorrelation are reported in parentheses. \*, \*\*, and \*\*\* indicate significance at the 0.10, 0.05, and 0.01 levels, respectively.

$$DV_{t+1} = \alpha + \varphi_1 \text{Agg\_Ret}_t + \varphi_2 \text{Agg\_Div}_t + \varphi_3 \text{Term}_t + \varphi_4 \text{DEF}_t + \varphi_5 \text{One\_yr\_ret}_t + \varepsilon_{t+1}$$

| <i>Dep Var</i>                    | <i>GDP<sub>t+1</sub></i> |                          | <i>Con<sub>t+1</sub></i>  |                         |
|-----------------------------------|--------------------------|--------------------------|---------------------------|-------------------------|
|                                   | (1)                      | (2)                      | (3)                       | (4)                     |
| Intercept                         | 1.41***<br>(6.38)        | 3.44***<br>(3.27)        | 1.30***<br>(7.15)         | 2.75***<br>(3.26)       |
| <b><i>Agg_Ret<sub>t</sub></i></b> | <b>2.60**<br/>(2.26)</b> |                          | <b>3.01***<br/>(2.78)</b> |                         |
| <i>Agg_Div<sub>t</sub></i>        |                          | <b>0.79**<br/>(2.13)</b> |                           | <b>0.55*<br/>(1.81)</b> |
| <i>Term<sub>t</sub></i>           | -6.28***<br>(-2.63)      | -5.53**<br>(-2.09)       | -6.54***<br>(-4.12)       | -5.76***<br>(-2.97)     |
| <i>DEF<sub>t</sub></i>            | -21.35<br>(-0.84)        | -37.59<br>(-1.37)        | -3.27<br>(-0.12)          | -14.09<br>(-0.48)       |
| <i>One_yr_ret</i>                 | 21.66***<br>(2.72)       | 21.05**<br>(2.21)        | 19.55**<br>(2.35)         | 19.70*<br>(1.98)        |
| Adj. R <sup>2</sup>               | 0.10                     | 0.09                     | 0.15                      | 0.09                    |
| Obs                               | 143                      | 143                      | 143                       | 143                     |

**Table A2: Corporate Profits and Economic Growth: Alternative Tax Difference Cutoff**

Table A2 reports the results for regressions of corporate profit growth on quarter-ahead economic growth using alternative tax difference cut-offs. TaxCutoff is an indicator variable equal to 1 during periods in which the difference between the U.S. corporate tax rate and the average OECD corporate tax rate is above a certain cutoff (In columns 1 & 3 the cutoff is 1%; in columns 2 & 4 the cutoff is 5%). Variable definitions are provided in the Appendix. *t*-statistics with Newey-West correction for autocorrelation are reported in parentheses. \*, \*\*, and \*\*\* indicate significance at the 0.10, 0.05, and 0.01 levels, respectively.

| <i>Dep Var</i>                               | GNP <sub>t+1</sub>             |                                  | GNP <sub>t+1</sub>             |                                   |
|----------------------------------------------|--------------------------------|----------------------------------|--------------------------------|-----------------------------------|
|                                              | 1%                             | 5%                               | 1%                             | 5%                                |
|                                              | (1)                            | (2)                              | (3)                            | (4)                               |
| Intercept                                    | 1.19<br>(0.97)                 | 2.86<br>(1.37)                   | 1.23<br>(0.97)                 | 3.01<br>(1.43)                    |
| CPN <sub>t</sub>                             | 0.03<br>(1.18)                 | 0.03***<br>(2.79)                | 0.03<br>(1.63)                 | 0.02***<br>(3.06)                 |
| TaxCutoff <sub>t</sub>                       | 0.08<br>(0.45)                 | 0.61<br>(1.06)                   | 0.10<br>(0.54)                 | 0.62<br>(1.03)                    |
| <b>TaxCutoff<sub>t</sub>*CPN<sub>t</sub></b> | <b>-0.02</b><br><b>(-0.75)</b> | <b>-0.03**</b><br><b>(-2.55)</b> | <b>-0.03</b><br><b>(-1.30)</b> | <b>-0.02***</b><br><b>(-2.77)</b> |
| Crisis                                       | -0.63***<br>(-2.64)            | -0.70***<br>(-3.05)              | -0.54**<br>(-2.48)             | -0.60***<br>(-2.79)               |
| GNP <sub>t</sub>                             | 0.08<br>(0.72)                 | 0.04<br>(0.32)                   | 0.08<br>(0.72)                 | 0.03<br>(0.24)                    |
| Term <sub>t</sub>                            | -0.82<br>(-0.61)               | -0.66<br>(-0.50)                 | -0.94<br>(-0.72)               | -0.96<br>(-0.74)                  |
| DEF <sub>t</sub>                             | 11.32<br>(0.64)                | 6.75<br>(0.41)                   | 7.12<br>(0.40)                 | 3.59<br>(0.22)                    |
| T-bill <sub>t</sub>                          | 5.02<br>(1.02)                 | 5.22<br>(1.15)                   | 6.49<br>(1.23)                 | 6.64<br>(1.33)                    |
| Ret <sub>t</sub>                             | 1.00<br>(1.27)                 | 0.88<br>(1.07)                   | 0.71<br>(1.02)                 | 0.61<br>(0.87)                    |
| Recession <sub>t</sub>                       | -1.06***<br>(-2.65)            | -1.10***<br>(-2.62)              | -1.05***<br>(-2.74)            | -1.12***<br>(-2.75)               |
| Openness <sub>t</sub>                        | 0.14<br>(0.03)                 | 2.61<br>(0.46)                   | 1.04<br>(0.24)                 | 3.73<br>(0.63)                    |
| Tech <sub>t</sub>                            | 0.07<br>(1.55)                 | 0.05<br>(0.84)                   | 0.08<br>(1.44)                 | 0.05<br>(0.83)                    |
| Productivity <sub>t</sub>                    | 0.01<br>(0.75)                 | -0.02<br>(-0.54)                 | 0.01<br>(0.45)                 | -0.02<br>(-0.71)                  |
| FX <sub>t</sub>                              | 0.00<br>(-0.20)                | -0.01<br>(-0.63)                 | 0.00<br>(-0.23)                | -0.01<br>(-0.63)                  |
| Rel_Inv_opp <sub>t</sub>                     | -0.05<br>(-0.71)               | 0.01<br>(0.08)                   | -0.03<br>(-0.47)               | 0.03<br>(0.33)                    |
| Ineq <sub>t</sub>                            | -0.13***<br>(-3.05)            | -0.11***<br>(-3.01)              | -0.13***<br>(-2.66)            | -0.10**<br>(-2.58)                |
| Adj. R <sup>2</sup>                          | 0.47                           | 0.49                             | 0.48                           | 0.49                              |
| Obs                                          | 155                            | 155                              | 155                            | 155                               |
